# Supplementary material
Source: publisher figshare collection journal article supplement (https://acs.figshare.com/ndownloader/files/3779872)
Supplement: Supplementary file 1 [file 3779872]

# Supporting Information

## **Nanocrystalline MOFs embedded in the crystals of other MOFs and their multifunctional performance for molecular encapsulation and energy-carrier storage**

Kyung Min Choi<sup>‡</sup>, Jung Hyo Park<sup>‡</sup>, Jeung Ku Kang\*

Graduate School of Energy, Environment, Water, and Sustainability (EEWS) and Department of Materials Science and Engineering, Korea Advanced Institute of Science and Technology (KAIST), Daejeon 305-701, Republic of Korea

<sup>‡</sup>These authors contributed equally

\*Corresponding author: [jeungku@kaist.ac.kr](mailto:jeungku@kaist.ac.kr)

### **Details for characterization of materials**

**Powder X-ray diffraction:** The powder X-ray data were collected using a SmartLab  $\theta$ -2 $\theta$  diffractometer in reflectance Bragg-Brentano geometry employing Johansson type Ge(111) monochromator filtered Cu K $\alpha$ 1 radiation at 1200W (40 KV, 30 mA) power and equipped with high speed 1D detector(D/teX Ultra). A crushed large single cubic crystal was scanned by 2 °/min scan speed in continuous mode.

**Nitrogen sorption for surface area:** For measuring the surface area, the nitrogen adsorption analysis was performed on a Quantachrome Autosorb-1 automatic volumetric instrument. A liquid nitrogen bath (77 K) and ultra-high purity trade nitrogen and helium were used through nitrogen adsorption measurements.

**Nuclear magnetic resonance (NMR):** The solution <sup>1</sup>H nuclear magnetic resonance (NMR) has been used to clarify the real existence of the nHKUST-1 linker in the MOF-5 crystals. NMR spectra were collected on the nHKUST-1 $\subset$ MOF-5 crystals dissolved in DCl (deuterium chloride)-digested solution. In detail, 8 mg of dried crystals were digested and dissolved with sonication in 1 ml dilute DCL solution (prepared from 200  $\mu$ l of 35% DCl/D<sub>2</sub>O solution (Aldrich) and 10 ml DMSO-d<sub>6</sub>). The digestion solution was used for the <sup>1</sup>H-NMR analysis (500 Hz, Korea Research Institute of Chemical Technology).

**Scanning electron microscopy (SEM):** In the SEM (JEOL, JSM-7600F) measurement, we used a mild electron beam, 0.5 KeV acceleration voltages in the gentle beam mode to avoid structural damage. We observed the surface and interior of the nHKUST-1 $\subset$ MOF-5 crystals to prove the existence of nHKUST-1 in MOF-5.

**Transmission electron microscopy (TEM) and Dispersive X-ray spectrometer (EDS):** The TEM images were collected by JEOL (JEM-ARM200F) Cs-corrected scanning transmission electron microscopy. EDS images were observed by using a BRUKER QUANTAX EDS.

**Confocal microscopy measurement:** The confocal microscopy data were collected using a Carl Zeiss confocal microscope (LSM510META NLO) after inserting a small amount ( $<10^{-4}$  mole %) of molecular dye (Rhodamine) inside the crystal. Rhodamine 6G was purchased from Sigma Aldrich. Before preparing Rhodamine@nHKUST-1, 0.146 M of the Rhodamine stock solution was made with DMF and Rhodamine 6G. 1 ml of the Rhodamine stock solution was added to the initial solution of the nHKUST-1 and the synthesized nHKUST-1. After making Rhodamine@nHKUST-1, the crystals were washed 8 times with DMF to remove the Rhodamine remaining on the surface of the crystals. After the washing process, we confirmed with the UV-Vis measurement that there was no Rhodamine left in the washing solvent. To see if Rhodamine was not coming out of nHKUST-1 in the synthesis of MOF-5, the Rhodamine@nHKUST-1 samples were dispersed in DEF and placed in an oven at 110 °C for the same period of time as the reaction of nHKUST-1@MOF-5. After removing Rhodamine@nHKUST-1 using a centrifuge, the remaining solvent was measured with UV-Vis and there was no absorbance of Rhodamine found, thus indicating that no dye was coming out from Rhodamine@nHKUST-1.

**High pressure adsorption of methane:** The high-pressure gases adsorption of methane ( $\text{CH}_4$ ) was measured by a gravimetric method, MSB (Magnetic Suspension Balances, Rubotherm, Germany). The MSB was equipped with a micro-balance and electromagnet to precisely measure the amount of gas adsorption. To obtain the adsorption isotherm, data points were corrected for two independent buoyancies: buoyancy from the empty vessel components of the gravimetric measuring system and buoyancy from the adsorbent material.

**Pore size distribution of nHKUST-1@MOF-5:**

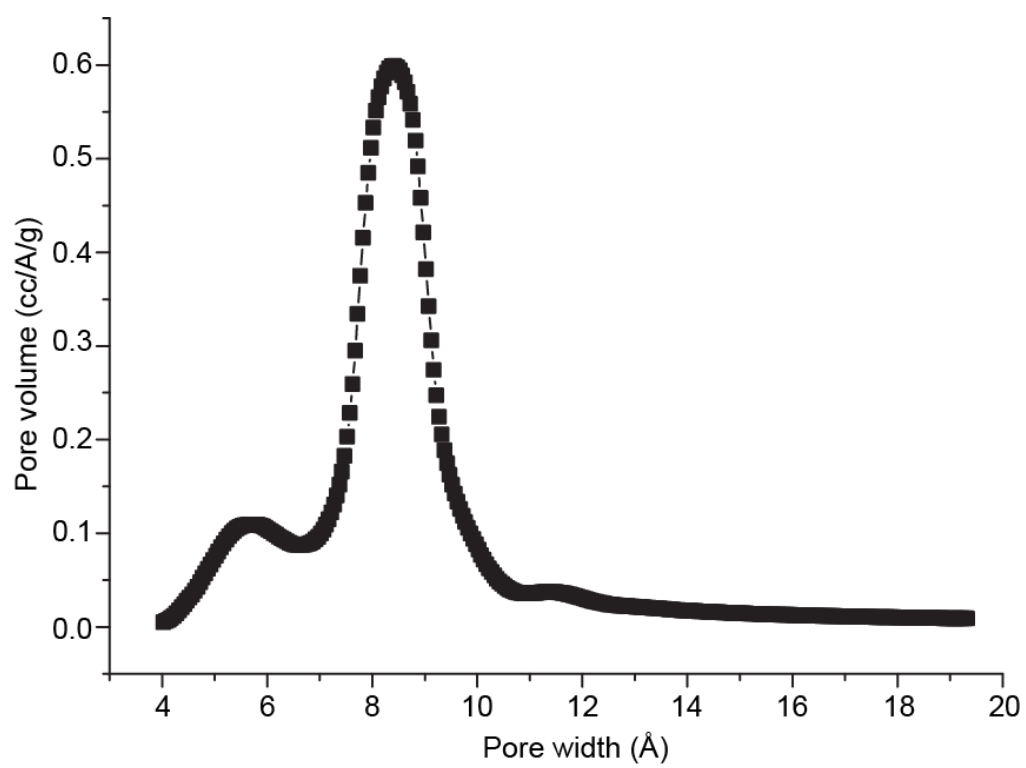

**Figure S1.** Pore-size distribution of nHKUST-1@MOF-5.

Thermogravimetric data of nHKUST-1⊂MOF-5 and MOF-5

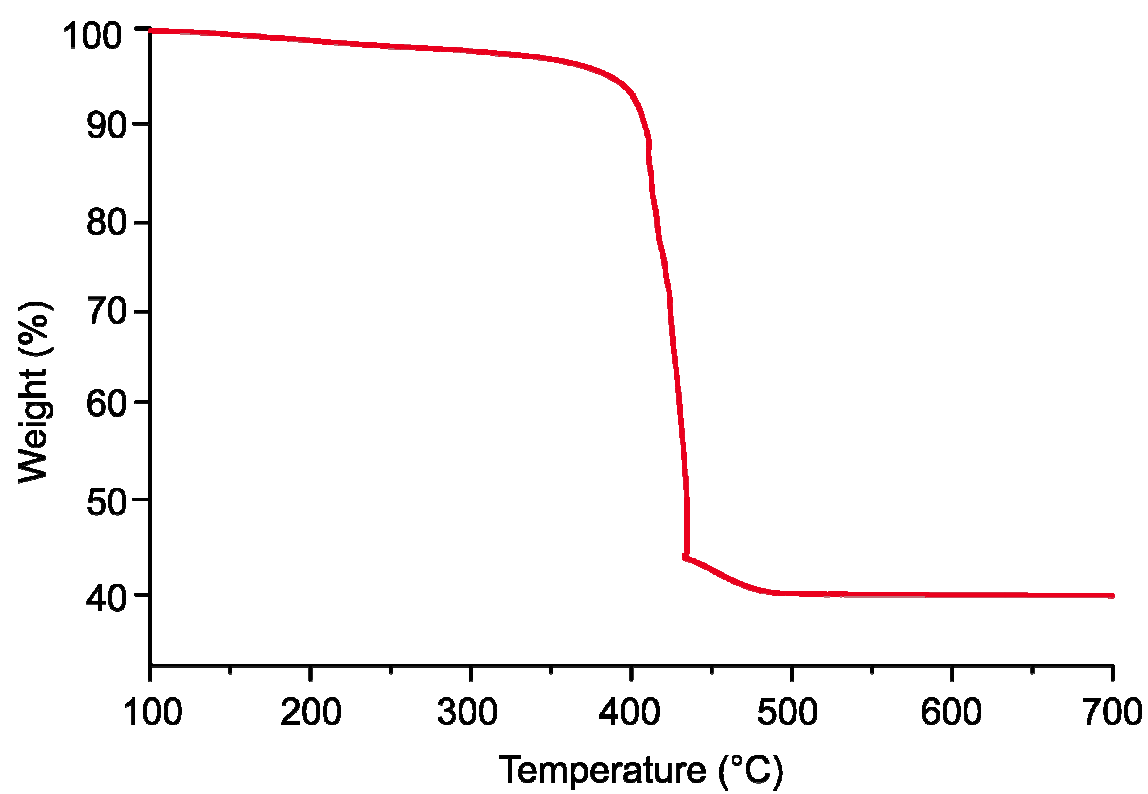

**Figure S2.** Thermogravimetric data of nHKUST-1⊂MOF-5.

# SEM Images for MOF-5 and nHKUST-1@MOF-5

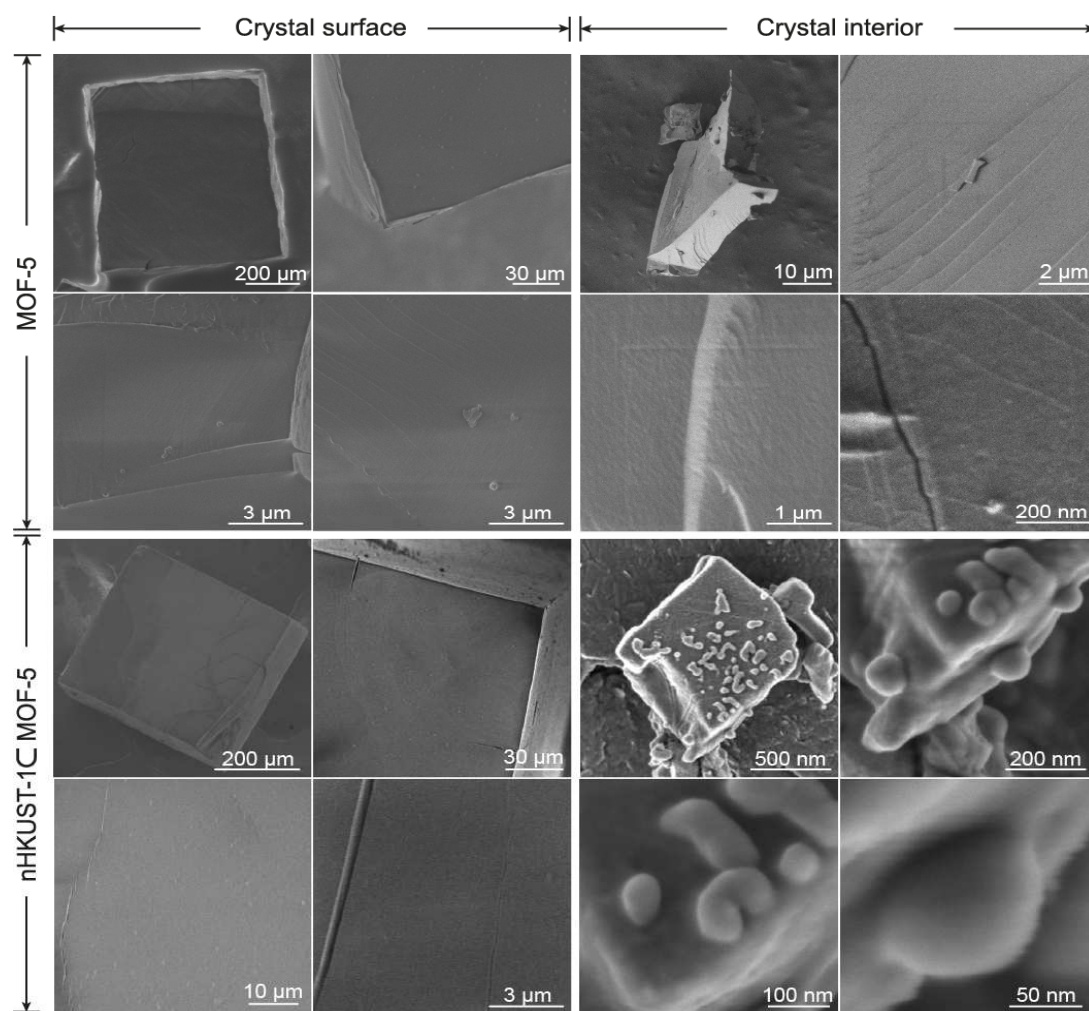

**Figure S3.** SEM images of MOF-5 and nHKUST-1@MOF-5 samples showing their surfaces and interior crystals.

**HRTEM and HAADF STEM images for the interface of nHKUST-1@MOF-5**

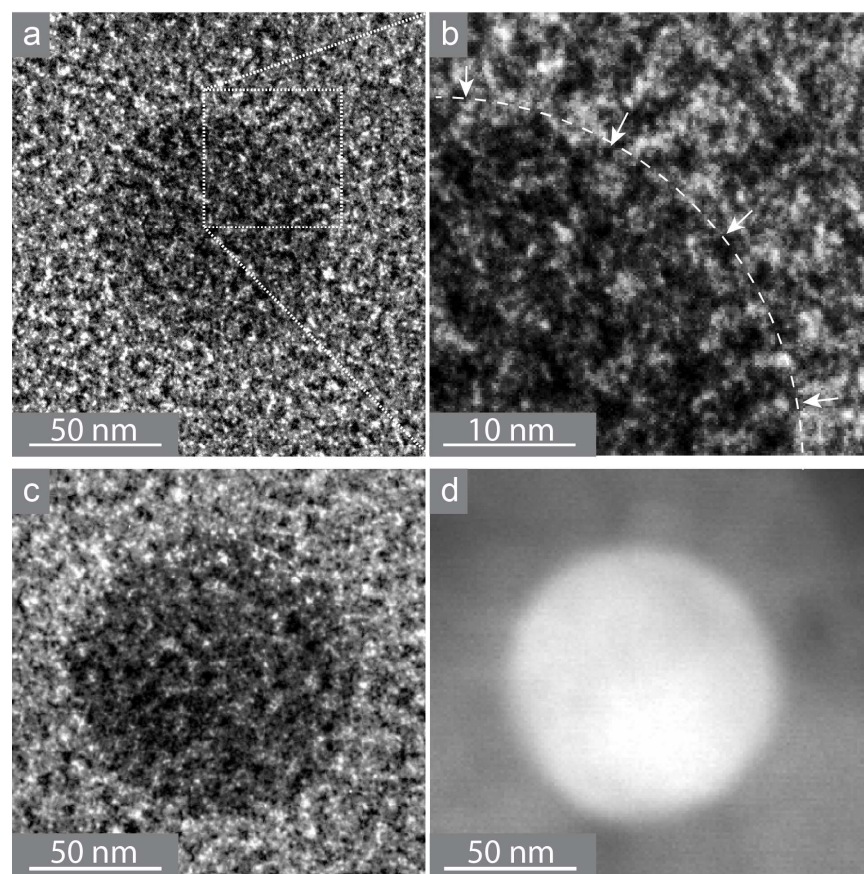

**Figure S4.** Observation for the interface of nHKUST-1 and MOF-5. a and c) HRTEM images of randomly selected two spots in the nHKUST-1@MOF-5 sample. b) high-magnification image of Figure S4a. d) HAADF STEM image of Figure S4c.

**CH<sub>4</sub> uptake capacities with different amount of nHKUST-1⊂MOF-5**

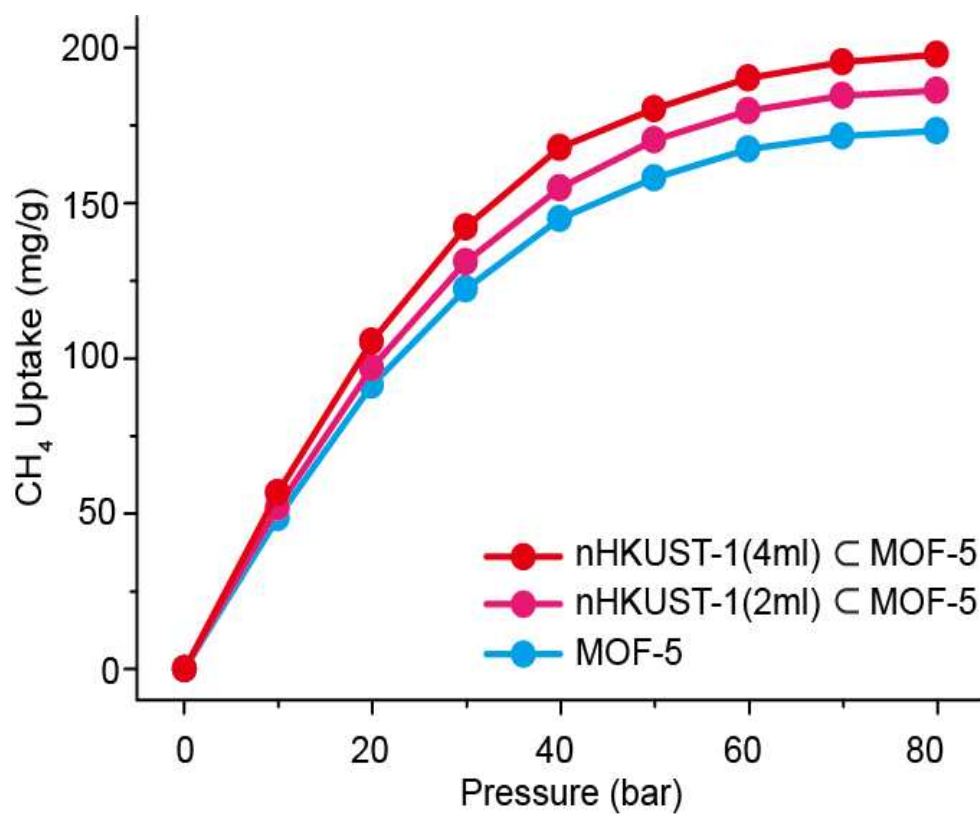

**Figure S5.** The CH<sub>4</sub> uptake capacities of nHKUST-1⊂MOF-5 samples embedding different loading amounts of nHKUST-1 crystals.
